# Supplementary material for: NXN Gene Epigenetic Changes in an Adult Neurogenesis Model of Alzheimer’s Disease
Source: MDPI journal article supplement (doi:10.3390/cells11071069), 2022-03-22

**Supplementary Figure S1.** Genomic positions of the CpGs analyzed by pyrosequencing. The graph illustrates the track obtained from the Chromatin State Segmentation by HMM from ENCODE/Broad track shown at the UCSC Genome Browser for the genes *CNTNAP1* (A), *SEPT5-GP1BB* (B), *TBX5* (C) and *NXN* (D). CpG islands are represented by isolated green boxes. At the bottom, CpG sites identified in the hippocampus of AD by the Infinium HumanMethylation450 BeadChip array (6) are displayed in bold and underlined. *NXN* following CpG next to cg19987768 included in the pyrogram assay is shown underlined.

**A**

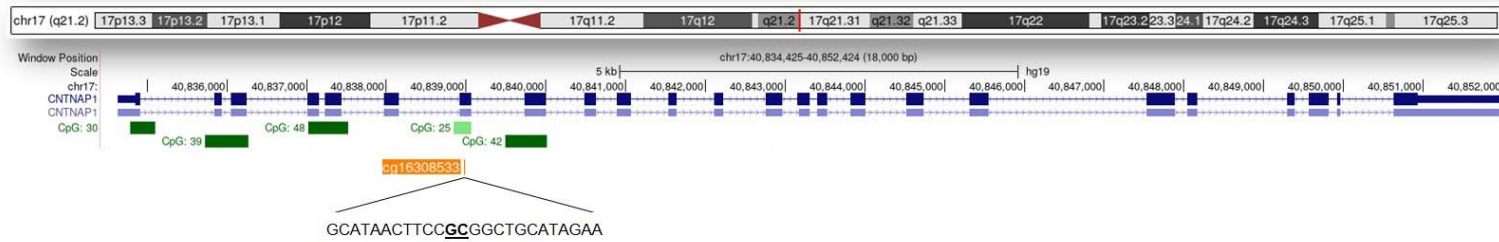

**B**

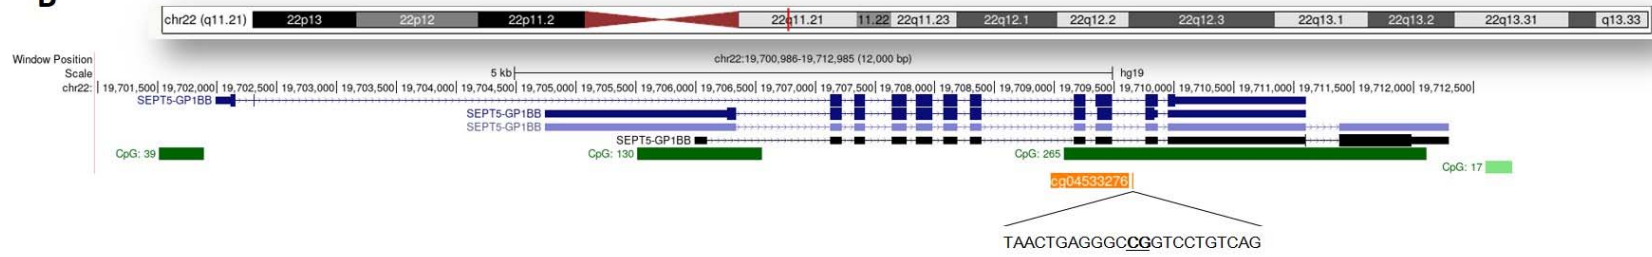

**C**

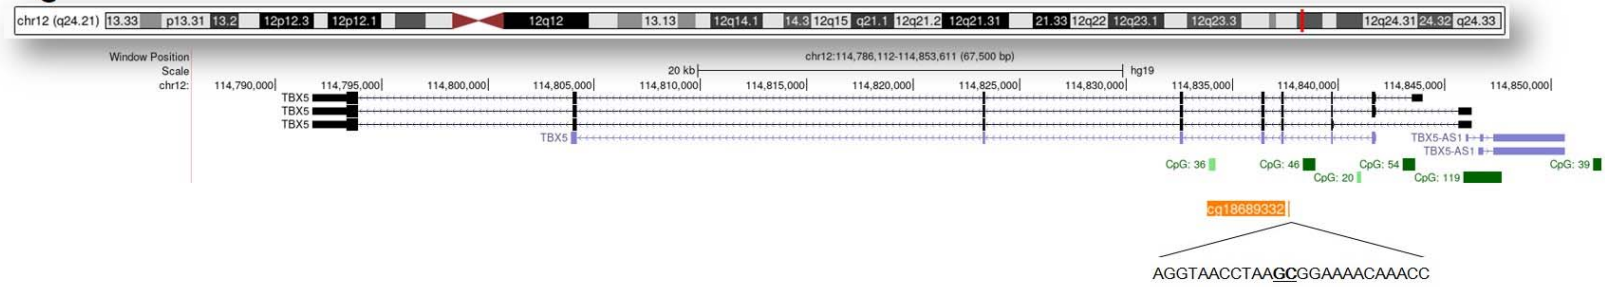

**D**

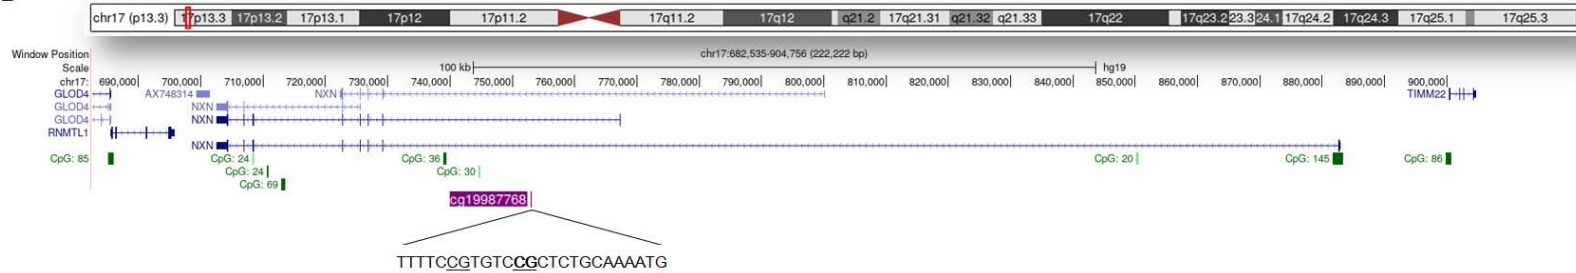

Supplement: s1 [file s1]
