# Supplementary material for: NXN Gene Epigenetic Changes in an Adult Neurogenesis Model of Alzheimer’s Disease
Source: MDPI journal article supplement (doi:10.3390/cells11071069), 2022-03-22
Supplement: s1 [file s1]

**Supplementary Table S1. Bisulfite pyrosequencing, bisulfite cloning sequencing and RT-qPCR primers.** The table shows the primer pairs used in the study.

| ID          | Accession number | Purpose        | Amplicon Size (bp) | Tm   | F Primer                     | Tm2  | R Primer                  |
|-------------|------------------|----------------|--------------------|------|------------------------------|------|---------------------------|
| TBX5 pyro   | NA               | Pyrosequencing | 113                | 60.2 | AAGGAGAAGGGAGGAGGTAATAGT     | 59.3 | ATCCCTTTAAAACATCTTCAAAACC |
| TBX5 seq    | NA               |                |                    | 47.0 | AGGAGGGTAATTGTAGGTAATTT      |      |                           |
| TBX5 q      | NM_000192        | qPCR           | 135                | 62.1 | GACTTCCTACCAGAACCACAAG       | 62.1 | GGGACCACGGGATATTCTTTAC    |
| NXN pyro    | NA               | Pyrosequencing | 126                | 57.7 | TTGGTAGATGAGGAATGTGAT        | 60.3 | AACCACACTTCCTACTCTTCTAT   |
| NXN seq     | NA               |                |                    | 45.1 | GGTAGGGTGAGTTTTT             |      |                           |
| NXN bis     | NA               | Bisulfite PCR  | 263                | 50.7 | GTTTTAAATGTTATTATAAATTTTAAGT | 58.3 | ATTCTACCAAAAAACAAACTTTCC  |
| NXN q       | NM_022463        | qPCR           | 125                | 61.2 | CCAAGTACAAAGCCAAAGAGG        | 61.4 | CAGGATGGTGAGCAAAGGG       |
| CNTNAP pyro | NA               | Pyrosequencing | 307                | 61.9 | TTTGTTGGGGATAGAGGGATTT       | 59.6 | CTCCTATACCCAAAAACCTCATT   |
| CNTNAP seq  | NA               |                |                    | 42.1 | GTTGAAGATTAAGTTTTTTATGTAG    |      |                           |
| CNTNAP q    | NM_003632        | qPCR           | 143                | 62.4 | CCCCATAGCATCAATATCACCC       | 62   | TCCATCACACGCCCTAAATAC     |
| SEPT5 pyro  | NA               | Pyrosequencing | 134                | 59.5 | AGGGAATGGTGTAAGTTTAAGT       | 56.2 | CACTACATCCAACAATAACCAAATA |
| SEPT5 seq   | NA               |                |                    | 46.8 | GGTGGGTTGATAGGA              |      |                           |
| SEPT5 q     | NM_002688        | qPCR           | 114                | 61.9 | GATCCATGTATACCAGTTCCTG       | 62.4 | ACCGTGTGCTGCCTATAAC       |
| NEUROD1     | NM_002500        | qPCR           | 143                | 61.8 | TCCCATGTCTTCCACGTTAAG        | 61.8 | GAGAAGTTGCCATTGATGCTG     |
| NCAM1       | NM_001076682     | qPCR           | 128                | 61.4 | CAAGAAAACAGATGAGGGCAC        | 62.3 | TCACAATATTCTGCCTGGCC      |
| TUBB3       | NM_006086        | qPCR           | 143                | 61.8 | CGGATCAGCGTCTACTACAAC        | 62.1 | CCAAAGATGAAATTGTCAGGCC    |
| RBFOX3      | NM_001082575     | qPCR           | 146                | 61.8 | AGATTTATGGAGGCTACGCAG        | 62.5 | GGTTCCAATGCTGTAGGTCG      |
| CALB1       | NM_004929        | qPCR           | 146                | 62.2 | CTGAAGGATCTGTGCGAGAAG        | 61.3 | CTCTAGTTATCCCCAGCACAG     |
| GFAP        | NM_002055        | qPCR           | 130                | 62.4 | CATGAAGCCGAAGAGTGGTAC        | 61.8 | AGGTCAAGGACTGCAACTG       |

Amplified transcripts are identified by RefSeq Accession or GeneBank accession number. qPCR: quantitative PCR; bp: base pair; Tm: Melting Temperature; NA: not applicable.
